# Supplementary material for: An Analysis of the Gene Expression Associated with Lymph Node Metastasis in Colorectal Cancer
Source: Hindawi journal article supplement (doi:10.1155/2023/9942663), 2023-09-07

Rectal Cancer  
N1-N2

CLCA1

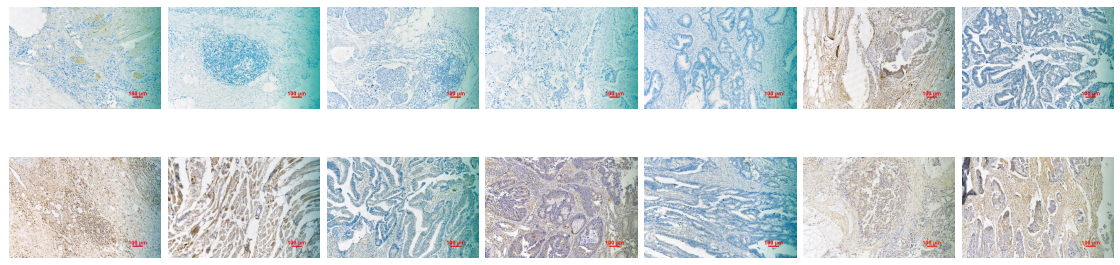

TUBB2B

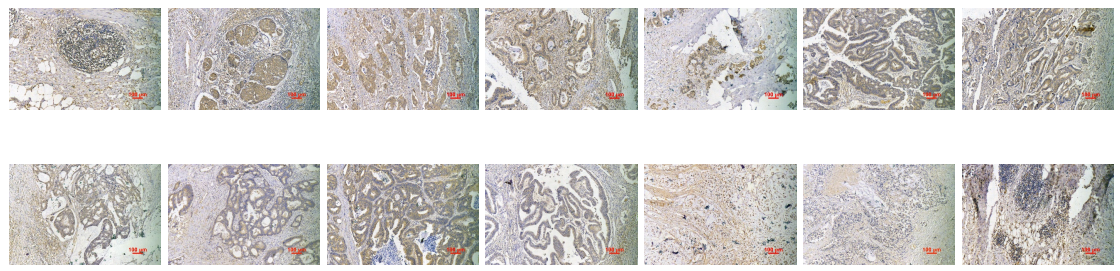

TMEM59L

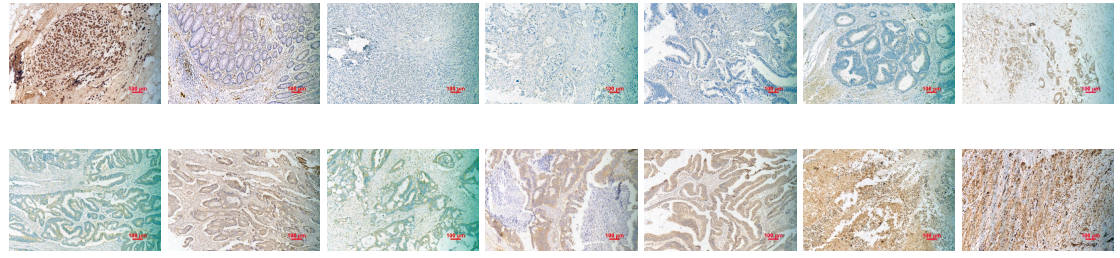

Supplement: f2 [file 9942663.f2.pdf]
