# Supplementary material for: An Analysis of the Gene Expression Associated with Lymph Node Metastasis in Colorectal Cancer
Source: Hindawi journal article supplement (doi:10.1155/2023/9942663), 2023-09-07

Colon Cancer

N0

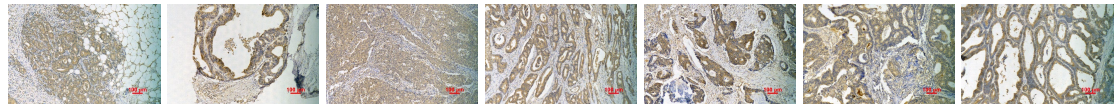

CLCA1

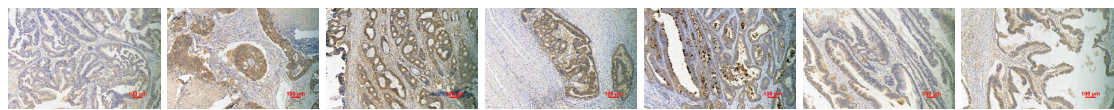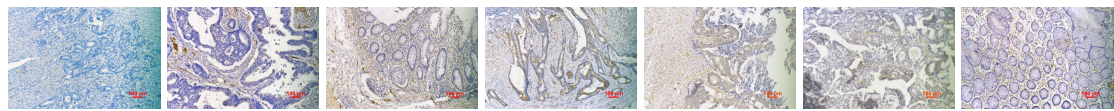

TUBB2B

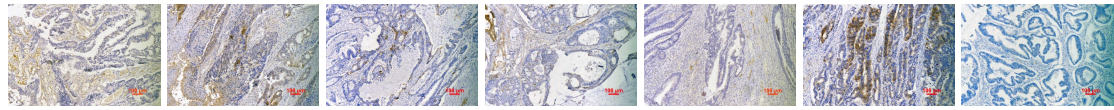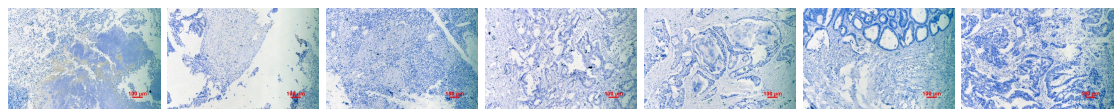

TMEM59L

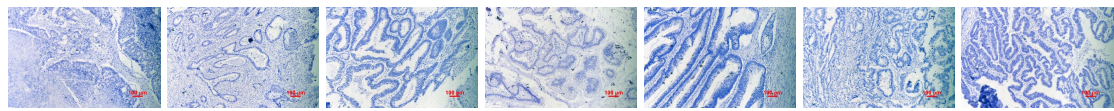

Supplement: f3 [file 9942663.f3.pdf]
